# Supplementary material
Source: PubMed Central journal article supplement (PMC5702058)
Supplement: joces-130-206318-s1.pdf [file joces-130-206318-s1.pdf]

## Valsecchi Supplementary Figure 1

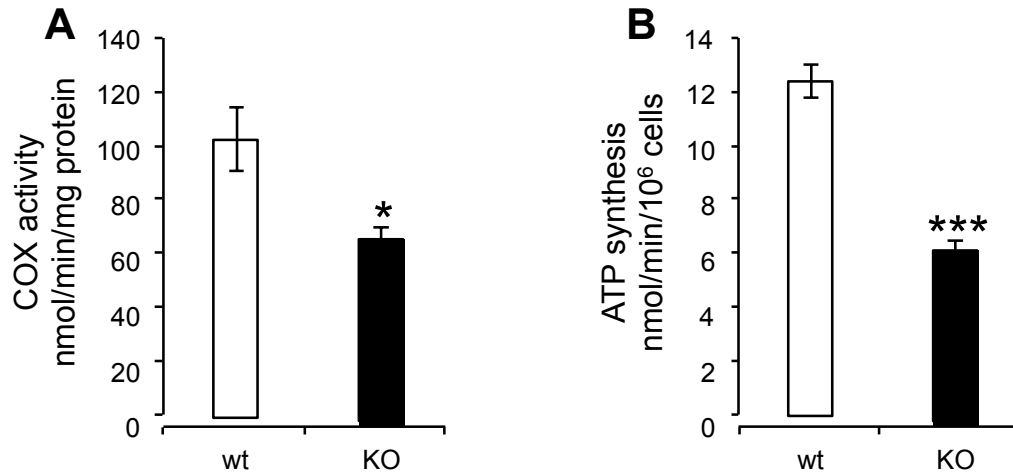

### Figure S1: COX activity and ATP synthesis in wt2 and sAC KO2 MEFs

A) COX activity in independent lines of wt2 and sAC KO2 MEFs (n=3). B) ATP synthesis in permeabilized wt2 and sAC KO2 MEFs (n=3). Data is expressed as mean±s.e.m. in indicated number of different biological replicates (\*p<0.05, \*\*\*p<0.001, Student's *t*-test).

## Valsecchi Supplementary Figure 2

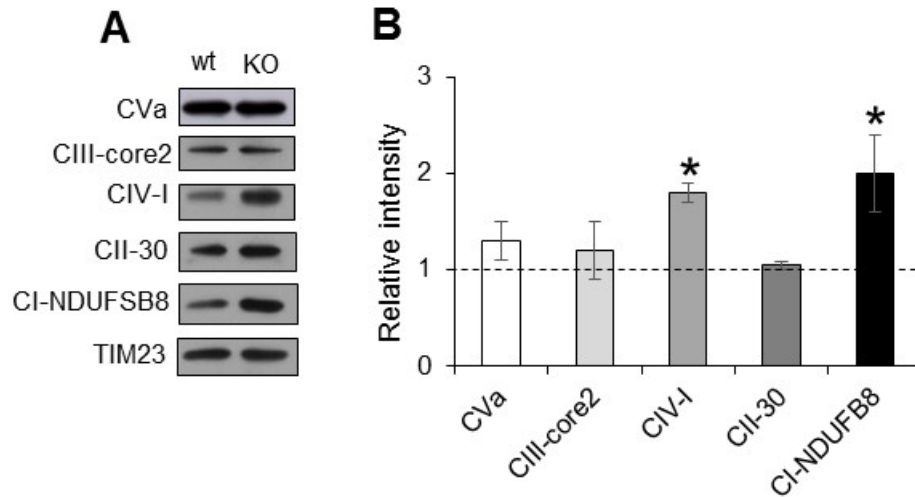

**Figure S2: Quantification of OXPHOS proteins in isolated mitochondria from wt and sAC KO cells.**

A) Representative western blot of OXPHOS subunits and TIM23. B) Quantification of band intensity normalized by TIM23 (n=5). Data is expressed as mean±s.e.m. in indicated number of different biological replicates (\*p<0.05, Student's *t*-test).

### Valsecchi Supplementary Figure 3

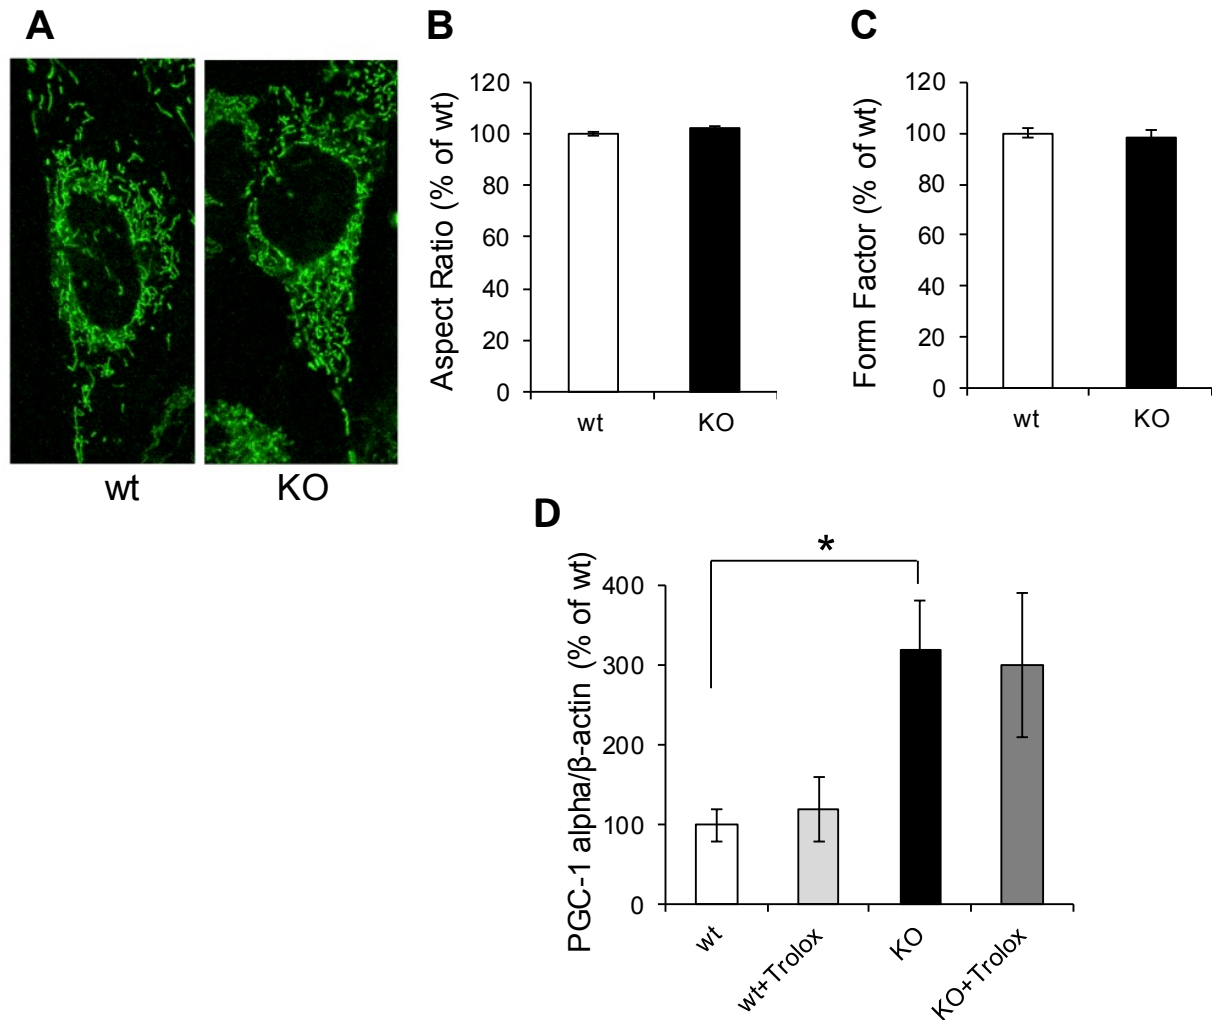

**Figure S3: mitochondrial morphology and effect of antioxidants on PGC-1 $\alpha$  expression.**

A) Representative image of wt and sAC KO cells loaded with MitoTracker Green 50nM. B) Mitochondria aspect ratio in wt and sAC KO MEFs expressed as % of wt. C) Mitochondrial form factor in wt and sAC KO MEFs expressed as a % of wt. In B and C, n=48-83 in 3 experiments. D) Effects of the antioxidant Trolox on PGC-1 $\alpha$  mRNA content (n=3) in wt and sAc KO cells. Data is expressed as mean $\pm$ s.e.m. in indicated number of different biological replicates (\*p<0.05, ANOVA with Tukey's correction).

### Valsecchi Supplementary Figure 4

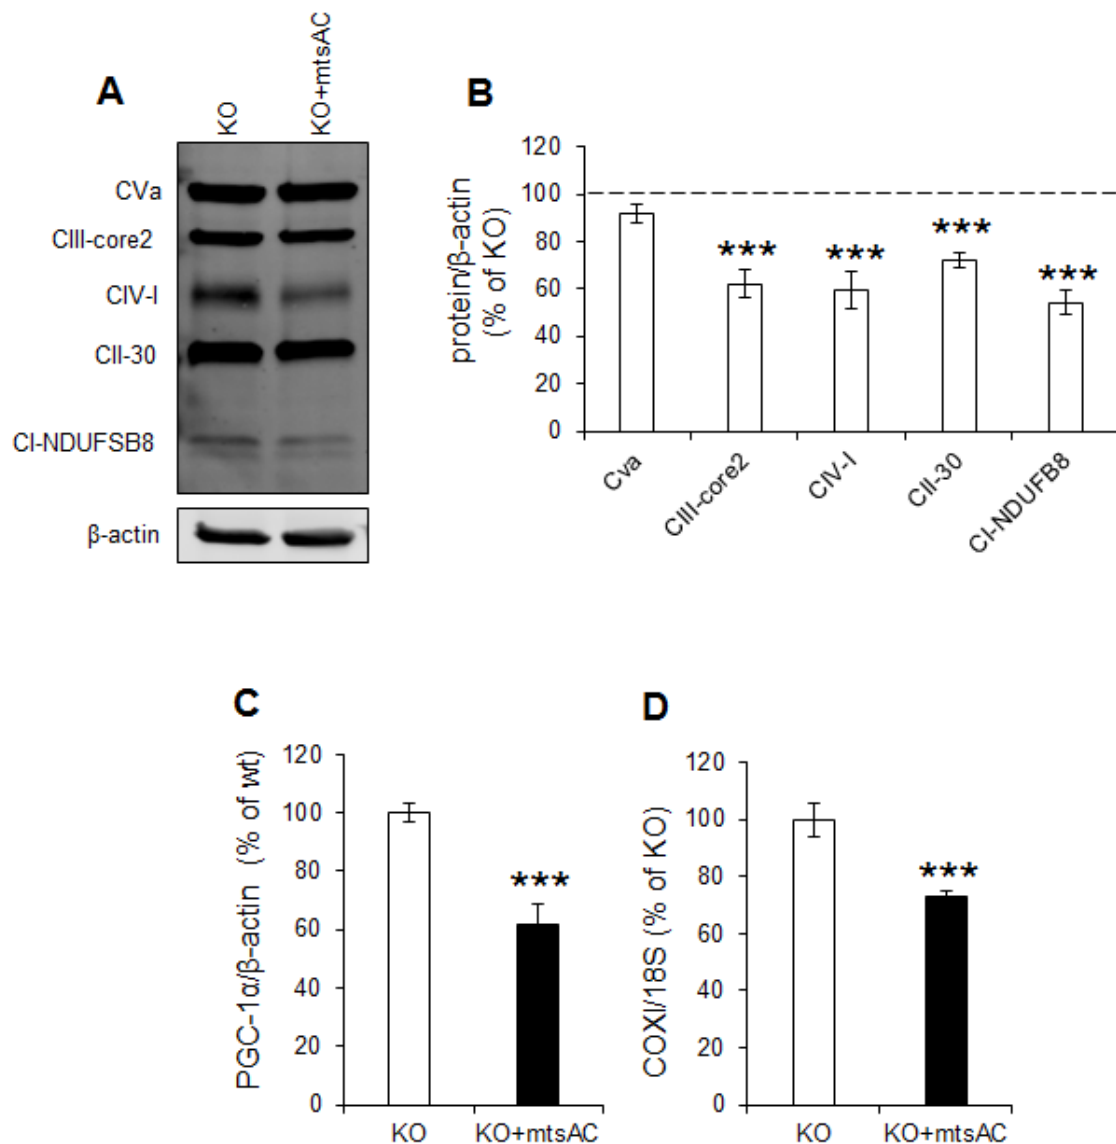

**Figure S4: mtsAC expression decreases OXPHOS component content in KO cells.** A) representative western blot of KO and KO+mtsAC cells probed with OXPHOS cocktails antibody. B) Quantification of the western blot. C) mRNA level of PGC1 $\alpha$  expressed as % of KO. C) Mitochondrial DNA content expressed as % of KO (COXI gene normalized by 18S rRNA). Data is expressed as mean $\pm$ s.e.m. in indicated number of different biological replicates (\*\*\*) $p$ <0.001, Student's  $t$ -test).

### Valsecchi Supplementary Figure 5

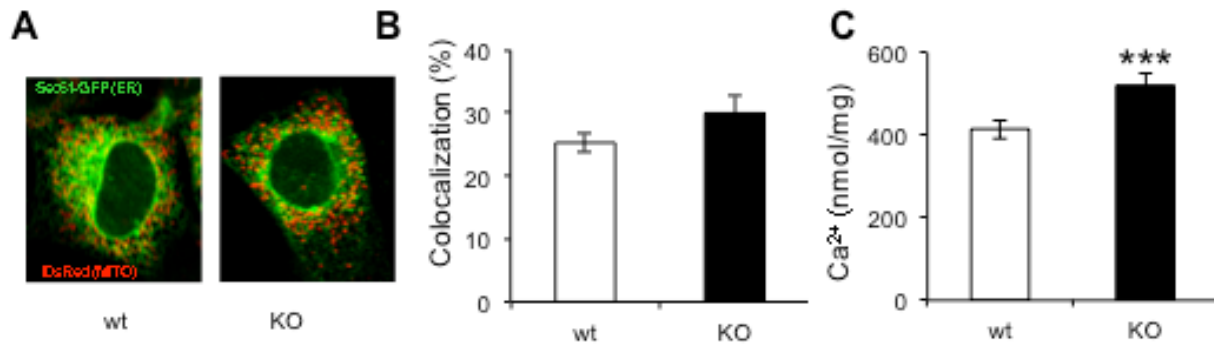

#### Figure S5: mitochondria Ca<sup>2+</sup> uptake and ER-mitochondria colocalization

A) Representative images of wt and sAC KO cells co-transfected with the ER protein Sec61-GFP (green) and mitochondrial mitoDsRed (red). B) Quantification of ER-Sec61-GFP and mitoDsRed colocalization assessed by the co-localization function of MetaMorph expresses as % of red over green. C) Mitochondrial Ca<sup>2+</sup> uptake in isolated mitochondria from wt and sAC KO MEFs (n=3). Data is expressed as mean±s.e.m. in indicated number of different biological replicates (\*\*\*)p<0.001, Student's *t*-test).

### Valsecchi Supplementary Figure 6

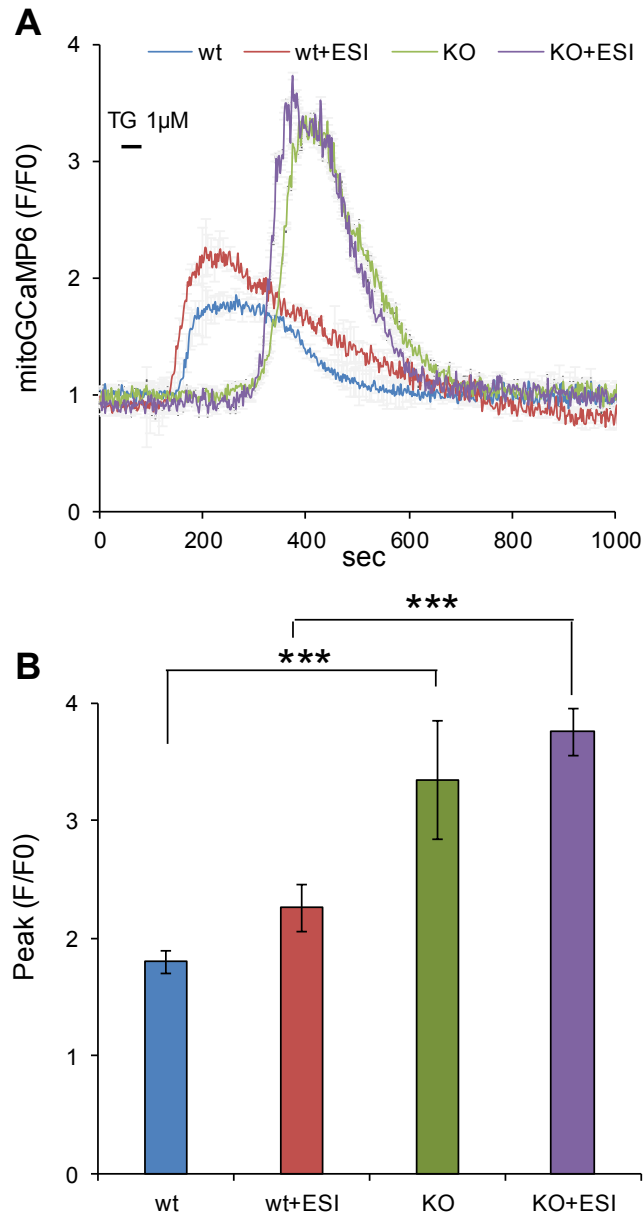

**Figure S6: Effect of EPAC inhibitor ESI-09 on mitochondrial  $\text{Ca}^{2+}$  uptake** A) Fluorescent traces of mitoGCaMP6 in wt and sAC KO (KO) MEFs treated with and without ESI-09 (ESI) and stimulated with TG. B) Quantification of mitoGCaMP6 fluorescence peaks (n=40, 32, 28, and 44 cells, for wt, wt + ESI, sAC KO, and sAC KO + ESI, respectively). Data is expressed as mean $\pm$ s.e.m. in indicated number of different biological replicates (\*\*\*)p<0.001, ANOVA with Tukey's correction).

## Valsecchi Supplementary Figure 7

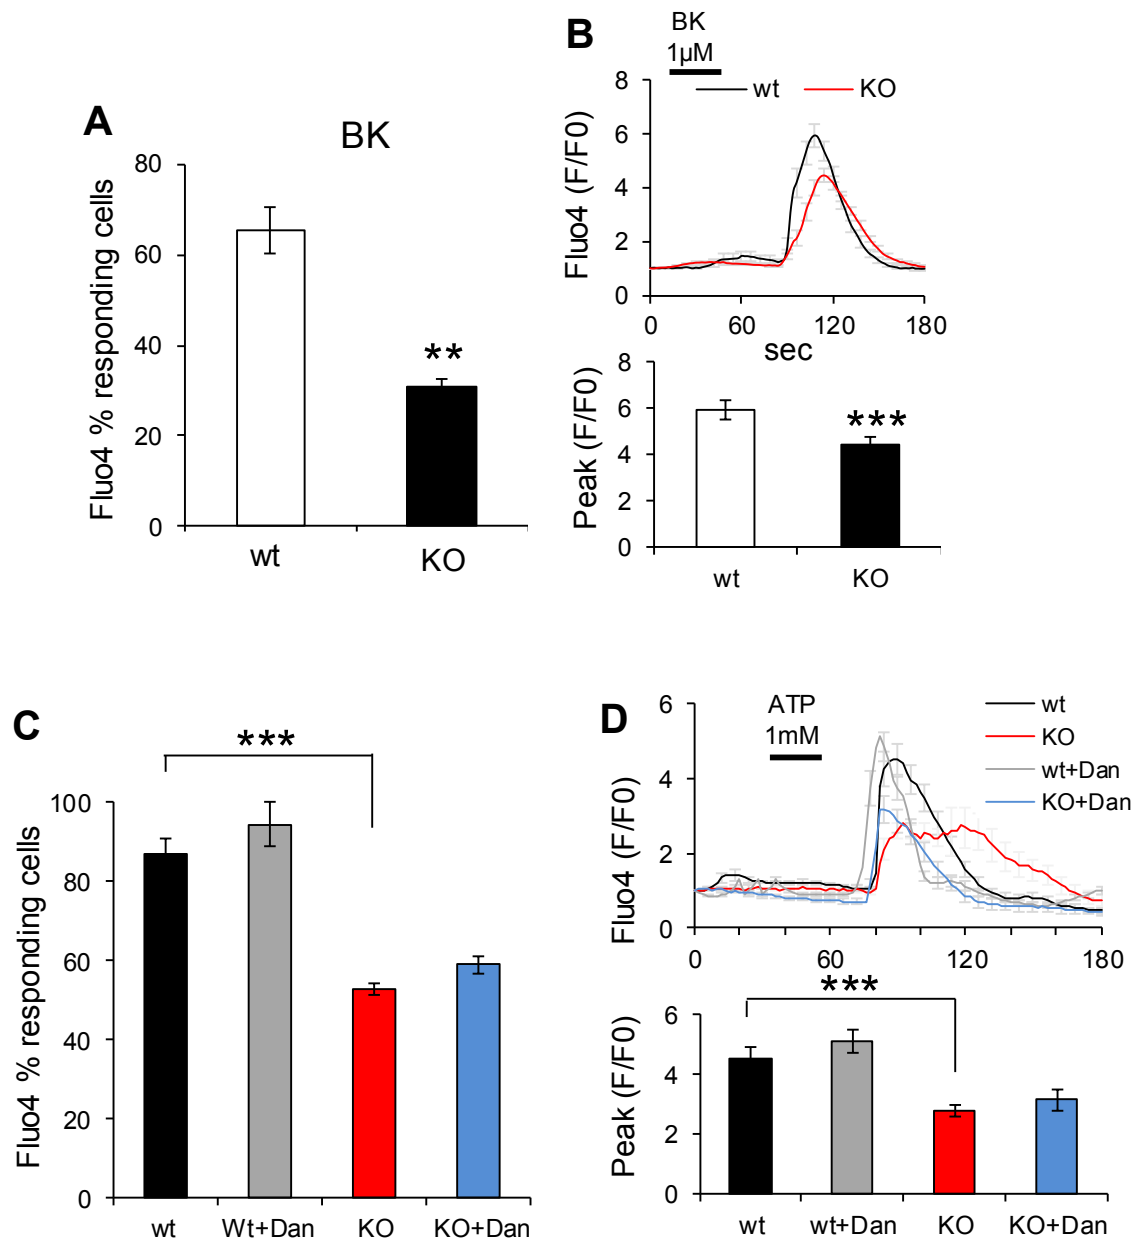

**Figure S7: cytosolic ER Ca<sup>2+</sup> release induced by Bradykinin stimulation, effects of dantrolene on ER Ca<sup>2+</sup> release,**

A) Percentage of responding wt and sAC KO MEFs upon Bradykinin (BK) stimulation. B) Top panel: Average fluo4 fluorescence curve in wt and sAC KO cells stimulated with 1μM bradykinin; Bottom panel: quantification of Ca<sup>2+</sup> peak in responding wt and sAC KO cells

(n=33-66 cells, in 3 independent experiments). Data is expressed as mean±s.e.m. in indicated number of different biological replicates (\*\*p<0.01, \*\*\*p<0.001, Student's *t*-test). C) Percentage of responding wt and sAC KO cells with and without dantrolene (10μM for 1 hour pre-incubation and in the perfusion buffer) and ATP (1mM). D) Top panel: fluo4 fluorescence in wt and sAC KO cells stimulated with ATP (1mM) in the presence or absence of dantrolene. Bottom Panel: quantification of the Fluo4 peak intensity in cells stimulated by ATP with and without dantrolene (n=15-27 cells, in 3 independent experiments). Data is expressed as mean±s.e.m. in indicated number of different biological replicates (\*\*\*p<0.001, ANOVA with Tukey's correction).



**Valsecchi Supplementary Figure 8**

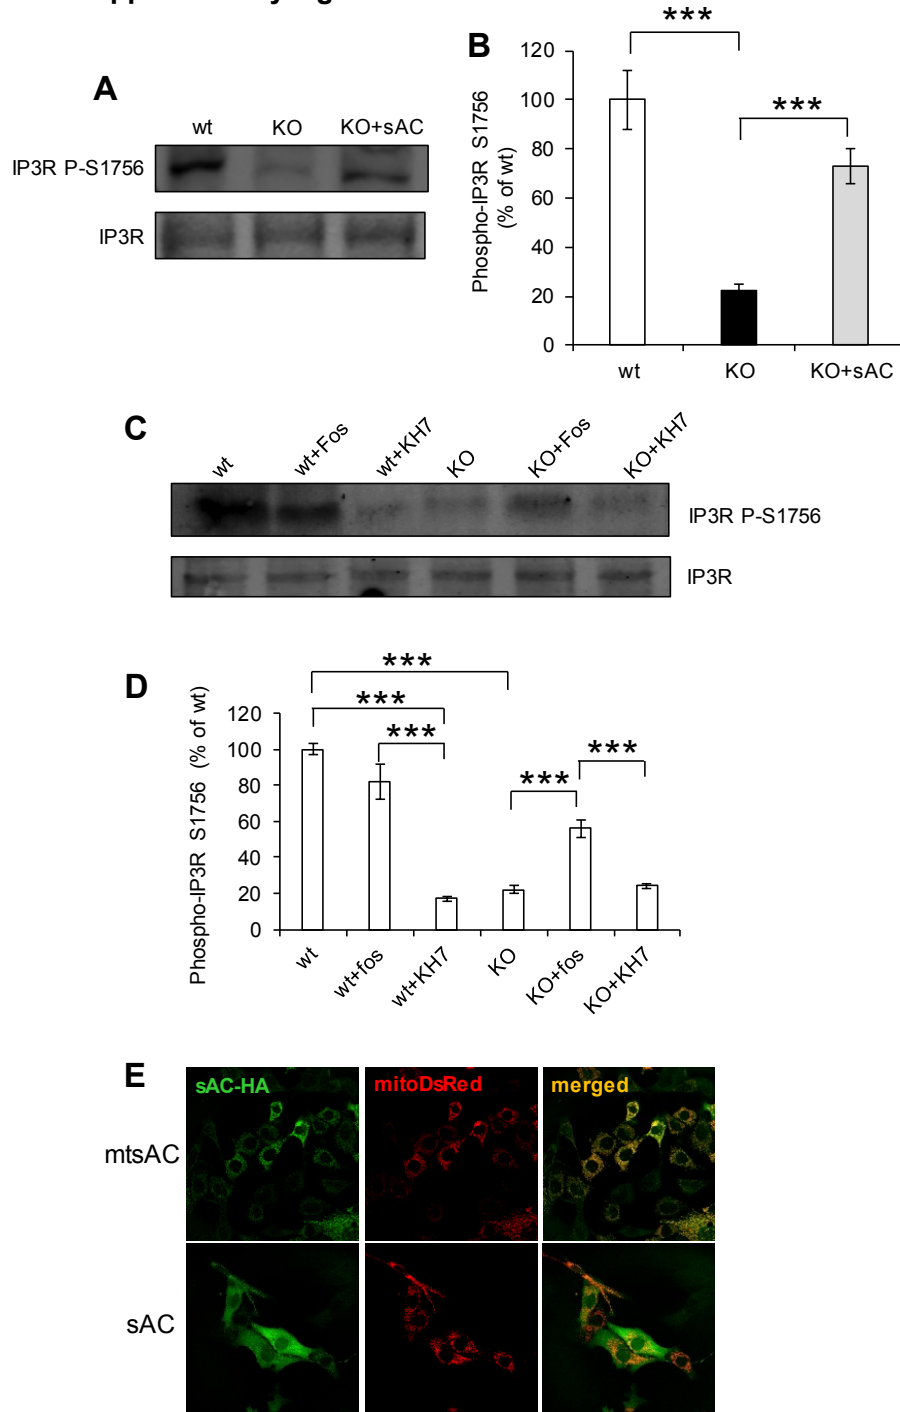

**Figure S8: IP3R phosphorylation is regulated by sAC by forskolin or KH7.**

A) Representative western blot of IP3R P-S1756 and total IP3R in wt, KO and KO+sAC cells. B) Quantification of P-S1756 normalized by total IP3R, in KO and KO+sAC cells expressed as % of wt (n=3). C) Representative western blot of IP3R P-S1756 and total IP3R in wt, and KO cells treated with forskolin and KH7. D) Quantification of P-S1756 normalized by total IP3R, in KO and KO+sAC cells expressed as % of wt (n=3). Data is expressed as mean±s.e.m. in

indicated number of different biological replicates (\*\* $p < 0.001$ , ANOVA with Tukey's correction). E) Representative images of MEF cells co-transfected with mtsAC-HA or sAC-HA (green) and mitoDsRed (red) and merged images.
